# Supplementary material
Source: publisher figshare collection journal article supplement (https://acs.figshare.com/ndownloader/files/21856608)
Supplement: Supplementary file 1 [file 21856608]

## Supporting Information

### **Polyelectrolytes functionalized $\text{Ti}_2\text{CT}_x$ MXene membranes for pervaporation dehydration of isopropanol/water mixtures**

Guozhen Liu, Song Liu, Kang Ma, Haoyu Wang, Xiaoyue Wang, Gongping Liu\*, Wanqin Jin

State Key Laboratory of Materials-Oriented Chemical Engineering, College of Chemical Engineering,

Nanjing Tech University, 30 Puzhu Road, Nanjing, 211816, P.R. China

Corresponding author: [gpliu@njtech.edu.cn](mailto:gpliu@njtech.edu.cn)

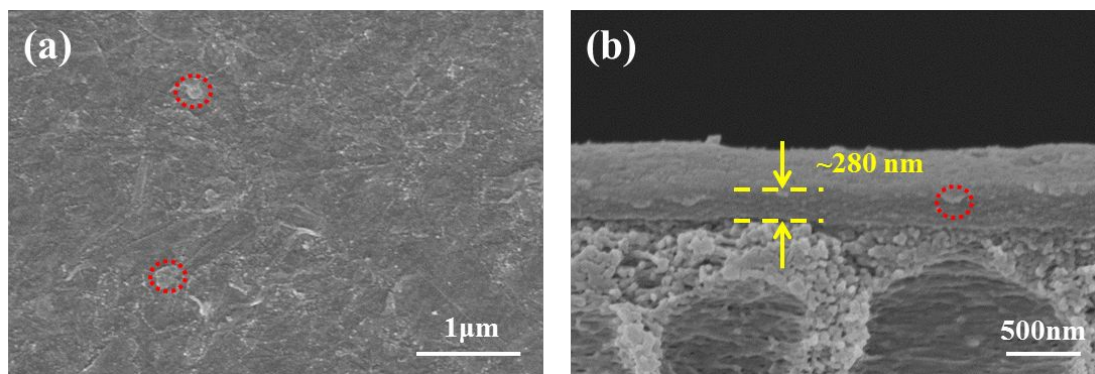

**Figure S1.** SEM image of MXene-PDDA membrane with MXene loading of 288 mg/m<sup>2</sup> and PDDA concentration of 0.28 mg/mL, (a) surface and (b) cross-section.
